# Supplementary material for: Influence of Planting Density on Sweet Potato Storage Root Formation by Regulating Carbohydrate and Lignin Metabolism
Source: MDPI journal article supplement (doi:10.3390/plants12102039), 2023-05-19
Supplement: s1 [file s1]

**Table S1.** Climatic growth condition for sweet potato.

| Year | Month        | Mean temperature (°C) | Precipitation (mm) | Field irrigation (mm) |
|------|--------------|-----------------------|--------------------|-----------------------|
| 2020 | Nov.(Haikou) | 23.40                 | 14.80              | 100                   |
|      | Dem.         | 19.07                 | 6.20               |                       |
|      | Jun.         | 16.35                 | 19.10              |                       |
|      | Few.         | 19.81                 | 26.20              |                       |
| 2021 | Mar.         | 24.20                 | 2.00               | 100                   |
|      | Nov. (Sanya) | 26.65                 | 10.20              |                       |
|      | Dem.         | 24.84                 | 8.30               |                       |
|      | Jun.         | 22.56                 | 15.60              |                       |
| 2022 | Few.         | 24.36                 | 14.30              |                       |
|      | Mar.         | 25.89                 | 6.40               |                       |

**Table S2.** Experimental soil physical and chemical properties.

| Experiment al sites | Sand content (%) | Soil density (g·cm <sup>-2</sup> ) | pH   | Organic matter content (%) | Alkalihydrolysable nitrogen (mg·kg <sup>-1</sup> ) | Available phosphorus (mg·kg <sup>-1</sup> ) | Available potassium (mg·kg <sup>-1</sup> ) |
|---------------------|------------------|------------------------------------|------|----------------------------|----------------------------------------------------|---------------------------------------------|--------------------------------------------|
| Haikou              | 50.4             | 1.41                               | 6.84 | 1.21                       | 52.56                                              | 9.01                                        | 80.63                                      |
| Sanya               | 48.3             | 1.40                               | 6.77 | 1.47                       | 74.09                                              | 14.36                                       | 69.82                                      |

**Table S3.** Genes primer sequences used in qRT-PCR.

| Gene           | Forward(5'-3')               | Reverse(3'-5')                |
|----------------|------------------------------|-------------------------------|
| <i>PAL</i>     | GGATCCAAGAGTGCAGGTCC         | CCTTGTCACATTCTCCCCG           |
| <i>C4H</i>     | GCGGCAAGAAGTACAAGCTC         | CTTGGCGTAATCGGTGAGAT          |
| <i>4CL</i>     | CTGAGGATGAAGTTAAAGAGTTTGTG   | GCCTGAGGGAGACTTTGGA           |
| <i>HCT</i>     | CCGTCGCTTACAGCTCCTAC         | CGGTGGCTATGTACAGCTTG          |
| <i>CCoAOMT</i> | GAGGCACCCACAAGACTACG         | TGGTTGTCTGATTCTCCGCC          |
| <i>CAD</i>     | GTCTTGGCGCAGACTCTTTC         | TAATGGCACAACAGCGTGAT          |
| <i>Ibkn1</i>   | AAAACCTCGGGAGATCACTGC        | GCAAGCCTCCTCCAATCTC           |
| <i>Ibkn2</i>   | GCCAGGCAGAAAGTTGCTTAG        | CAGTGCCGTTTTCTTTGGTT          |
| <i>Ibkn3</i>   | CGCCTAGGTCCATAATCC           | TATTTCAAGGCGGTCTCA            |
| <i>GBSS</i>    | GGACGTGCTGAAGGTGATAA         | CGAGAGCTCTTGTGACATGC          |
| <i>Sps</i>     | TCTGAAGATTTCTCGGATGA         | AGTAAGGAGCATAGGCACA           |
| <i>Susy</i>    | CTTGAGATTTCGTCGCTACCTT       | CTGAACCCTCCCTTCATCTTAC        |
| <i>AGPase</i>  | GCAGACTTGTCTAGATCCTGATG      | CCGCTTCTTTGTGAGAGGATAG        |
| <i>SSS</i>     | GACTGTGGGATCTACTGAAAGG       | TTGCTGGCTCCTGAGAATTTA         |
| <i>SBEI</i>    | CCTTCTCGTGGGTCTTTCATAC       | ACCAGTAGTGCATGGTGAAG          |
| <i>β-actin</i> | AGCAGCATGAAGATTAAGGTTGTAGCAC | TGGAATAATTAGAAGCACTTCCTGTGAAC |
